# Supplementary material for: Synthesis of a photo-caged aminooxy alkane thiol
Source: Royal Society of Chemistry journal article supplement (doi:10.1039/b904195h), 2009-01-01

## ***Supplementary Information***

# **Synthesis of a Photo-caged Aminoxy Alkane Thiol**

**Rock J. Mancini, Ronald C. Li, Zachary P. Tolstyka, and Heather D. Maynard\***

*Department of Chemistry and Biochemistry, University of California, Los Angeles, 607 Charles E. Young Drive South, Los Angeles, CA 90095-1596. Fax: 1-310-206-3403; Tel: 1-310- 267-5162;  
E-mail:maynard@chem.ucla.edu*

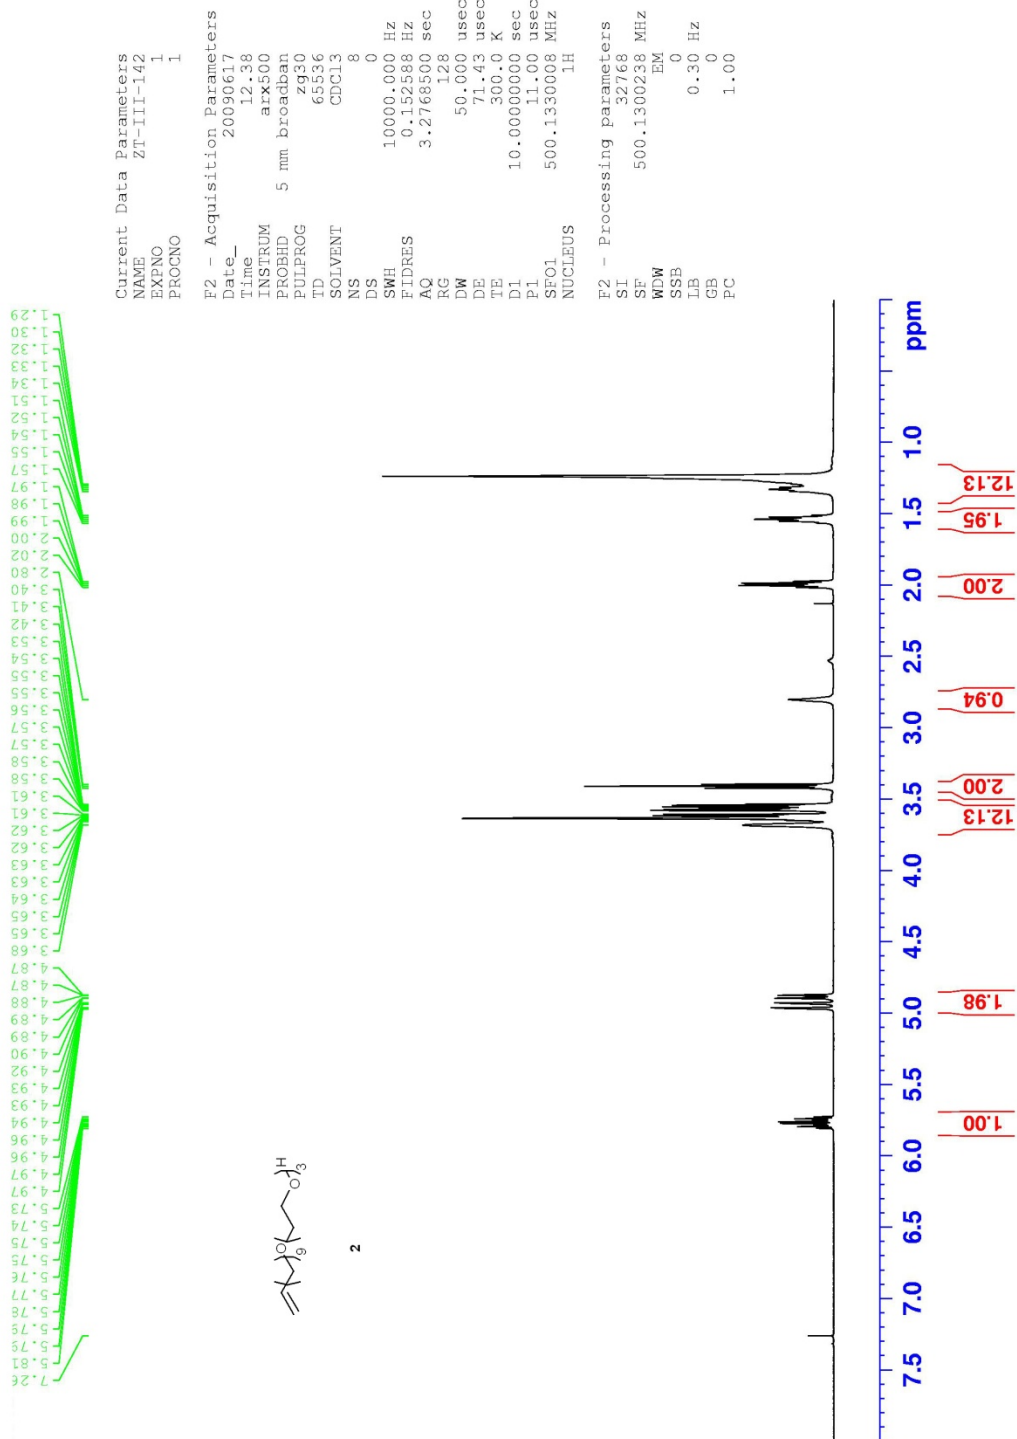



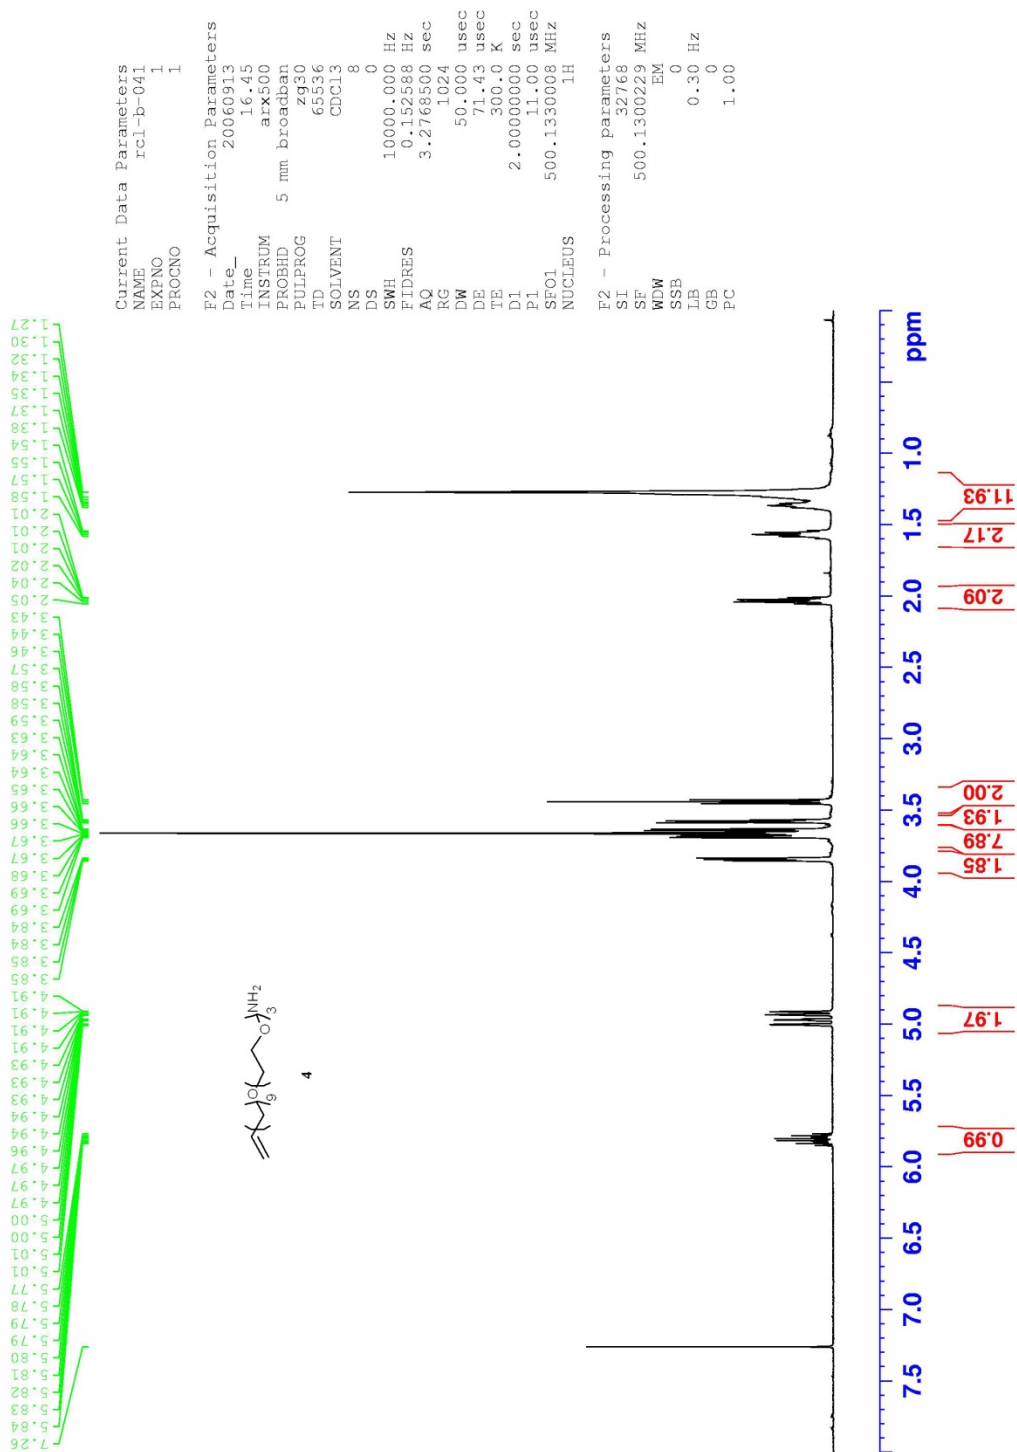

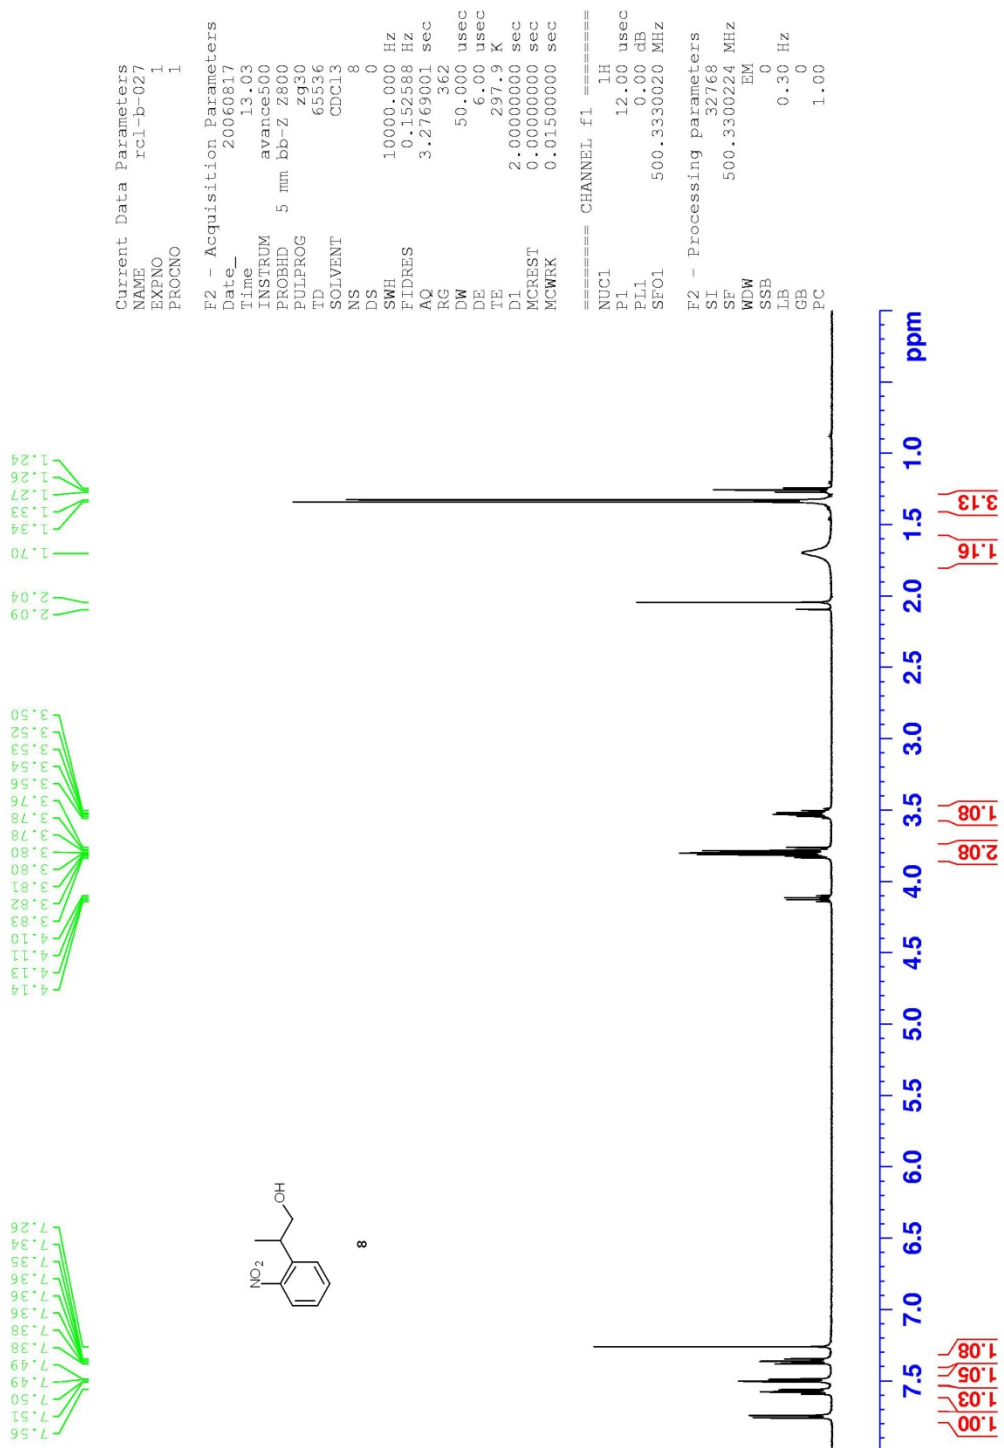

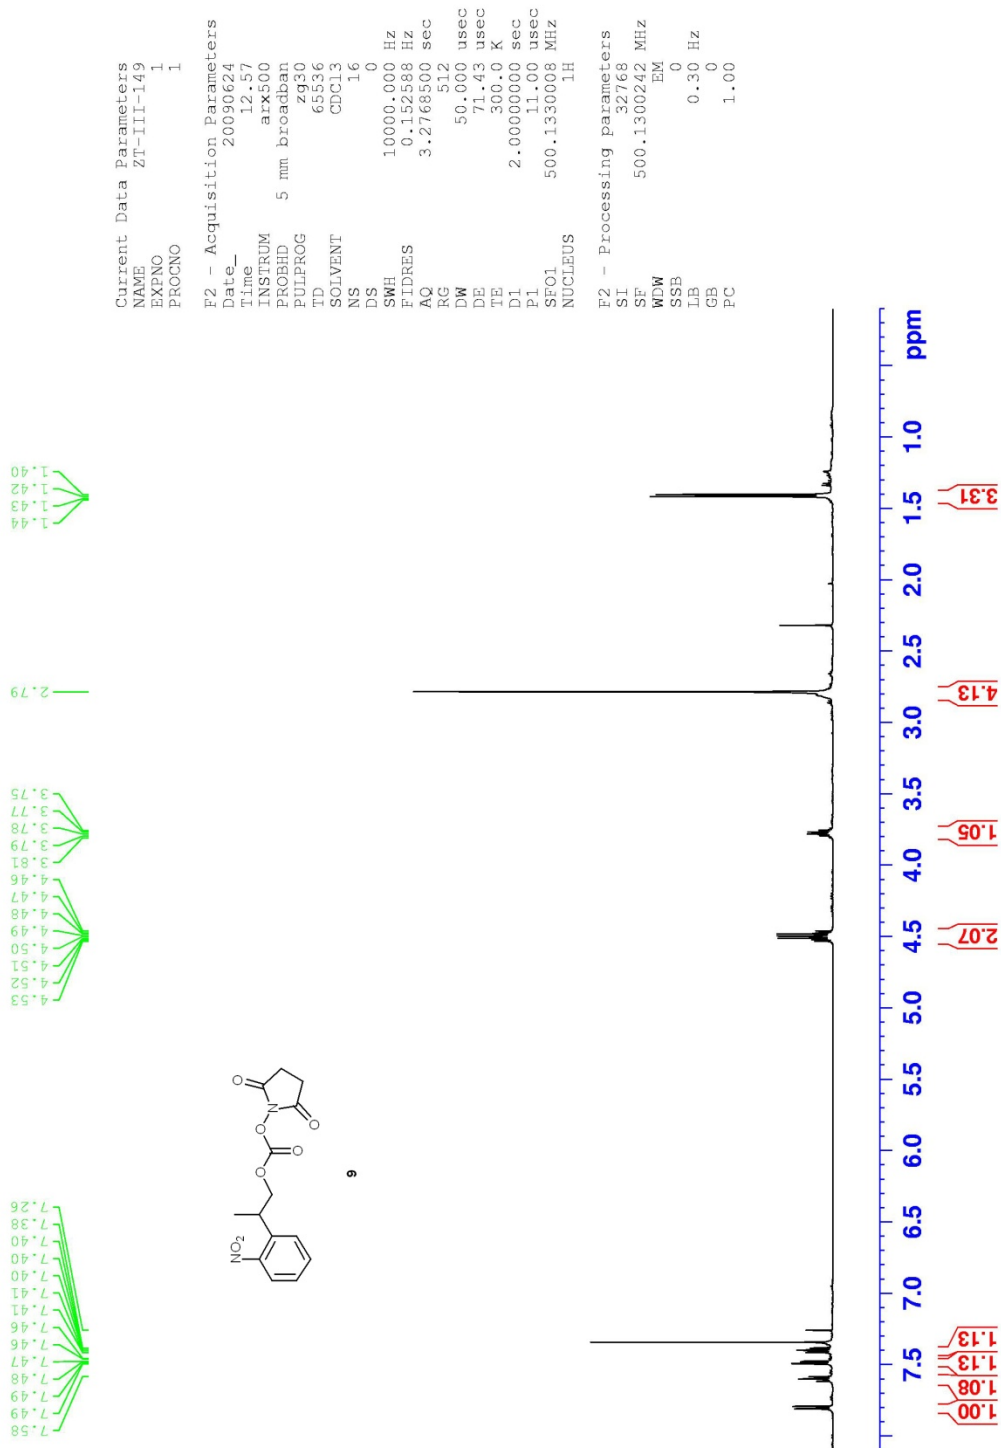

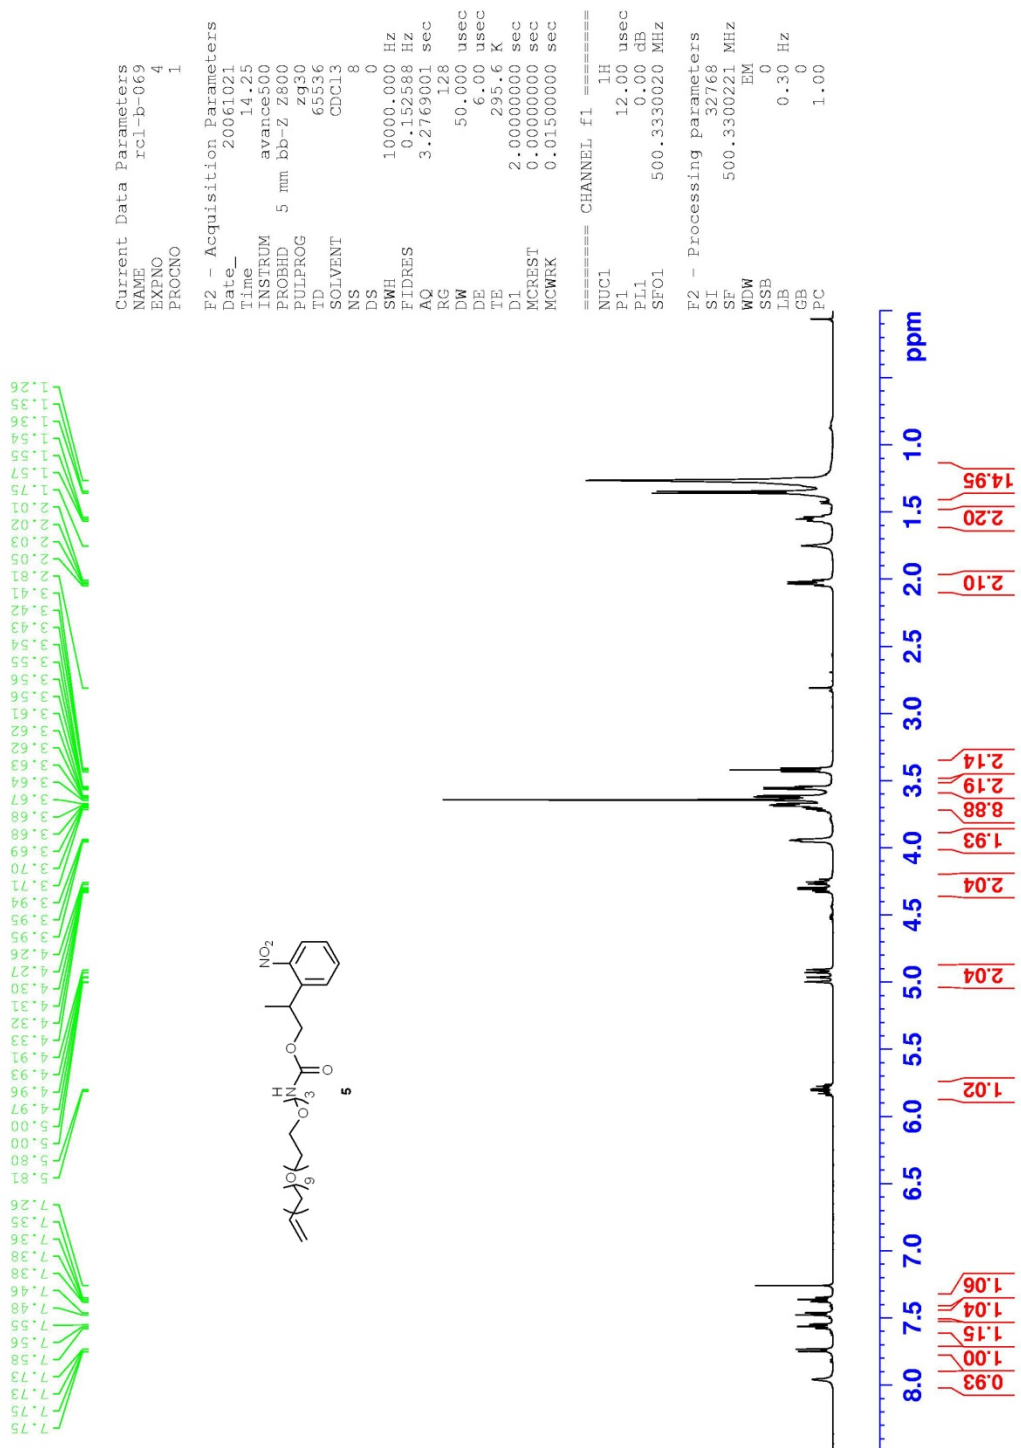

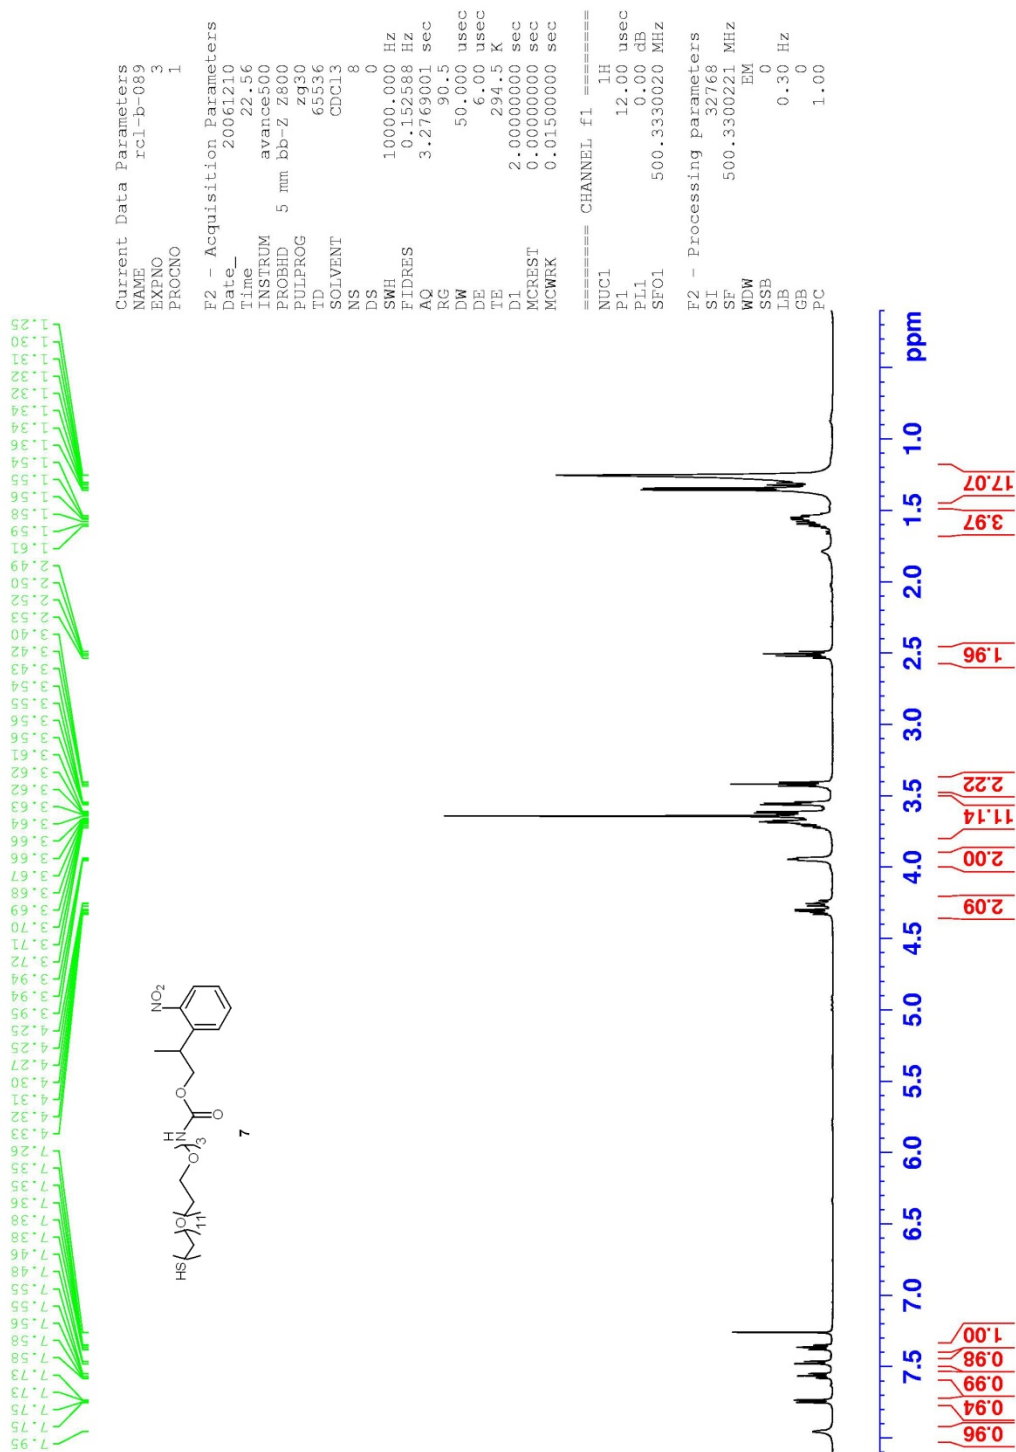

Supplement: b904195h.pdf [file b904195h.pdf]
